# Supplementary material for: A Survey on the Actual Use of and Reasons for Heated Tobacco Products in Patients with Rheumatoid Arthritis
Source: MDPI journal article supplement (doi:10.3390/ijerph191912465), 2022-09-30
Supplement: s1 [file s1]

Table S1. The primary questionnaire and the secondary questionnaire

| Primary questionnaire                                                                                                                              |                                                                                                                                                                                                                                          |
|----------------------------------------------------------------------------------------------------------------------------------------------------|------------------------------------------------------------------------------------------------------------------------------------------------------------------------------------------------------------------------------------------|
| Questions                                                                                                                                          | Responses                                                                                                                                                                                                                                |
| 1. Sex                                                                                                                                             | Male, Female                                                                                                                                                                                                                             |
| 2. Age                                                                                                                                             | __ years                                                                                                                                                                                                                                 |
| 3. What area do you live in?                                                                                                                       | Hokkaido, Tohoku, Kanto, Chubu, Kinki, Chugoku, Shikoku, Kyushu                                                                                                                                                                          |
| 4. Equivalent household income (million Japanese Yen)                                                                                              | -1.9, 2.0-3.9, 4.0-7.9, 8.0-11.9, 12.0-, Do not know, Unwilling to answer                                                                                                                                                                |
| 5. Do you currently smoke?                                                                                                                         | Do not smoke, Only cigarettes, Only HTPs, HTPs and cigarettes                                                                                                                                                                            |
| 6. Which of the following diseases are you currently suffering from?<br>*Must be diagnosed by a medical institution.<br>*Multiple answers possible | Hypertension, Diabetes, Dyslipidemia, Hyperuricemia/gout, Cardiovascular disease, Hepatic disease, Kidney disease, Rheumatoid arthritis, Chronic obstructive pulmonary disease, Cancer, Atopic dermatitis, Psoriasis, Others, No disease |
| Secondary questionnaire                                                                                                                            |                                                                                                                                                                                                                                          |
| Questions                                                                                                                                          | Responses                                                                                                                                                                                                                                |
| 1. How often do you drink?                                                                                                                         | None, $\leq 1$ per month, 2-4 per month, 2~3 per week, $\geq 4$ times a week                                                                                                                                                             |
| 2. How many cigarettes do you smoke on average per day?<br>*Please answer the combined number of cigarettes and HTPs.                              | -10, 11-20, 21-30, 31-                                                                                                                                                                                                                   |
| 3. Please tell us your academic history.                                                                                                           | Junior high school, High school, University or Technical school, Graduate school, Other, Unwilling to answer                                                                                                                             |
| 4. Who are your family living together?                                                                                                            | Living alone, Parents, Brothers and sisters, Parents, brothers and sisters, Spouse, Children, Spouse and children, Parents and spouse, Parents, spouse and children, Other                                                               |
| 5. How long you have been diagnosed with rheumatoid arthritis?                                                                                     | -4.9, 5-9.9, 10-19.9, 20-, Do not know                                                                                                                                                                                                   |
| 6. Which of the following conditions best                                                                                                          | Mild, Moderate, Severe, Most severe                                                                                                                                                                                                      |

|                                                                                                                                                                                                                                                                                                                                                                                                                                                                                                                                                                                                                                                                                                                                                                                          |                                                                                                      |
|------------------------------------------------------------------------------------------------------------------------------------------------------------------------------------------------------------------------------------------------------------------------------------------------------------------------------------------------------------------------------------------------------------------------------------------------------------------------------------------------------------------------------------------------------------------------------------------------------------------------------------------------------------------------------------------------------------------------------------------------------------------------------------------|------------------------------------------------------------------------------------------------------|
| <p>describes to your current disease status of rheumatoid arthritis?</p> <p>*Class 1 to 4 in the following definition correspond to mild, moderate, severe, and most severe in this order.</p> <p>I - Complete ability to carry out all the usual duties without handicaps</p> <p>II - Adequate for normal activities despite handicap of discomfort or limited motion of one of the joints</p> <p>III - Limited to little or none of the duties of usual occupation or self-care</p> <p>IV - Incapacitated, largely or wholly bed-ridden or confined to a wheelchair with little or no self-care</p> <p><a href="https://www.mhlw.go.jp/new-info/kobetu/kenkou/ryumachi/dl/jouhou01-11-0003.pdf">https://www.mhlw.go.jp/new-info/kobetu/kenkou/ryumachi/dl/jouhou01-11-0003.pdf</a></p> |                                                                                                      |
| 7. Have you ever been hospitalized due to rheumatoid arthritis?                                                                                                                                                                                                                                                                                                                                                                                                                                                                                                                                                                                                                                                                                                                          | Yes, No                                                                                              |
| 8. How did you get started with HTPs?                                                                                                                                                                                                                                                                                                                                                                                                                                                                                                                                                                                                                                                                                                                                                    | Switch from cigarettes or add to cigarettes,<br>From the beginning                                   |
| 9. Please select one option that best describes the reason for HTPs use.                                                                                                                                                                                                                                                                                                                                                                                                                                                                                                                                                                                                                                                                                                                 | Less harmful to the health, Less smoke and odor, Taste, Appearance/Fashion, More smoking area, Other |
| 10. Do you think cigarettes and HTPs differ in their negative impact on your rheumatoid arthritis?                                                                                                                                                                                                                                                                                                                                                                                                                                                                                                                                                                                                                                                                                       | Yes - Cigarettes are more harmful, Yes - HTPs are more harmful, No                                   |
| 11. Have you ever considered using HTPs due to your rheumatoid arthritis?                                                                                                                                                                                                                                                                                                                                                                                                                                                                                                                                                                                                                                                                                                                | Yes, No                                                                                              |
| 12. Do you feel that the use of HTPs relieves your disease? (If you are not using HTPs, answer based on what you think might occur)                                                                                                                                                                                                                                                                                                                                                                                                                                                                                                                                                                                                                                                      | Yes, No                                                                                              |
| 13. After starting HTPs, did your smoking frequency change? / Do you think smoking frequency will change once you start using HTP?                                                                                                                                                                                                                                                                                                                                                                                                                                                                                                                                                                                                                                                       | Yes - Increased, Yes - Decreased, No / Yes - Will increase, Yes - Will decrease, No                  |
